# Supplementary material
Source: PubMed Central journal article supplement (PMC3686835)
Supplement: NIHMS459319-supplement-01.pdf [file NIHMS459319-supplement-01.pdf]

**Item S1: Structured Interview Questions for physicians regarding the education worksheet intervention.**

1. Was using the educational worksheet helpful in clinic?
2. Did you find you needed to modify how the worksheet was used in clinic, in a manner different from that presented during the intervention training curriculum?
3. Do you feel there are benefits to using the worksheet with patients in clinic?
4. Do you have concerns about using the worksheet in daily practice with patients in clinic?
5. Do you feel there are limitations to using the worksheet with patients in clinic?
6. Did you find the worksheet impacts time spent with patients in clinic?
7. Would you recommend other medical providers involved in the care of patients with CKD use this worksheet?
8. If available, would you continue to use this worksheet in your own practice in the future?
9. Is there any other input you have, regarding the educational worksheet, or its use?
